# Supplementary material
Source: PubMed Central journal article supplement (PMC5624516)
Supplement: NIHMS868797-supplement-1.pdf [file NIHMS868797-supplement-1.pdf]

## Supplemental Figure 1

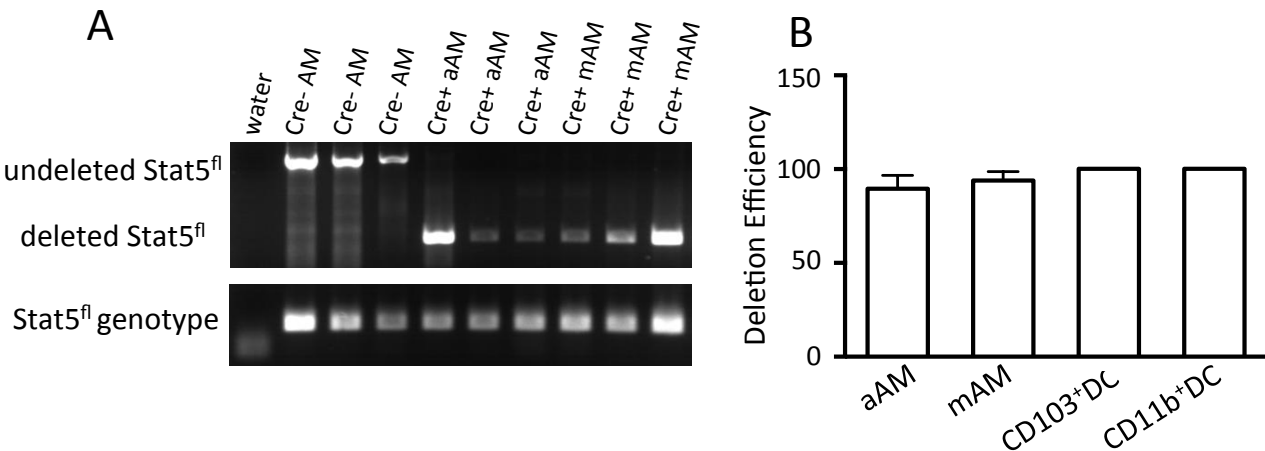

**Supplemental Figure 1. Deletion Efficiency of Stat5<sup>fl</sup> in CD11c<sup>+</sup> cells in the lung.** Lungs cells from Cre<sup>-</sup> and Cre<sup>+</sup>Stat5<sup>fl</sup> mice were processed for flow cytometry and cell sorting of SigF<sup>int</sup>CD11c<sup>int</sup>CD11b<sup>high</sup> (aAM), SigF<sup>high</sup>CD11c<sup>high</sup>CD11b<sup>low</sup> (mAM), CD11c<sup>+</sup>CD103<sup>+</sup> (CD103<sup>+</sup>DC), and CD11b<sup>+</sup> DC cell populations. (A, B) PCR was performed on the DNA isolated from these cells to measure the deletion efficiency of Stat5. (n=3 mice/group)

## Supplemental Figure 2

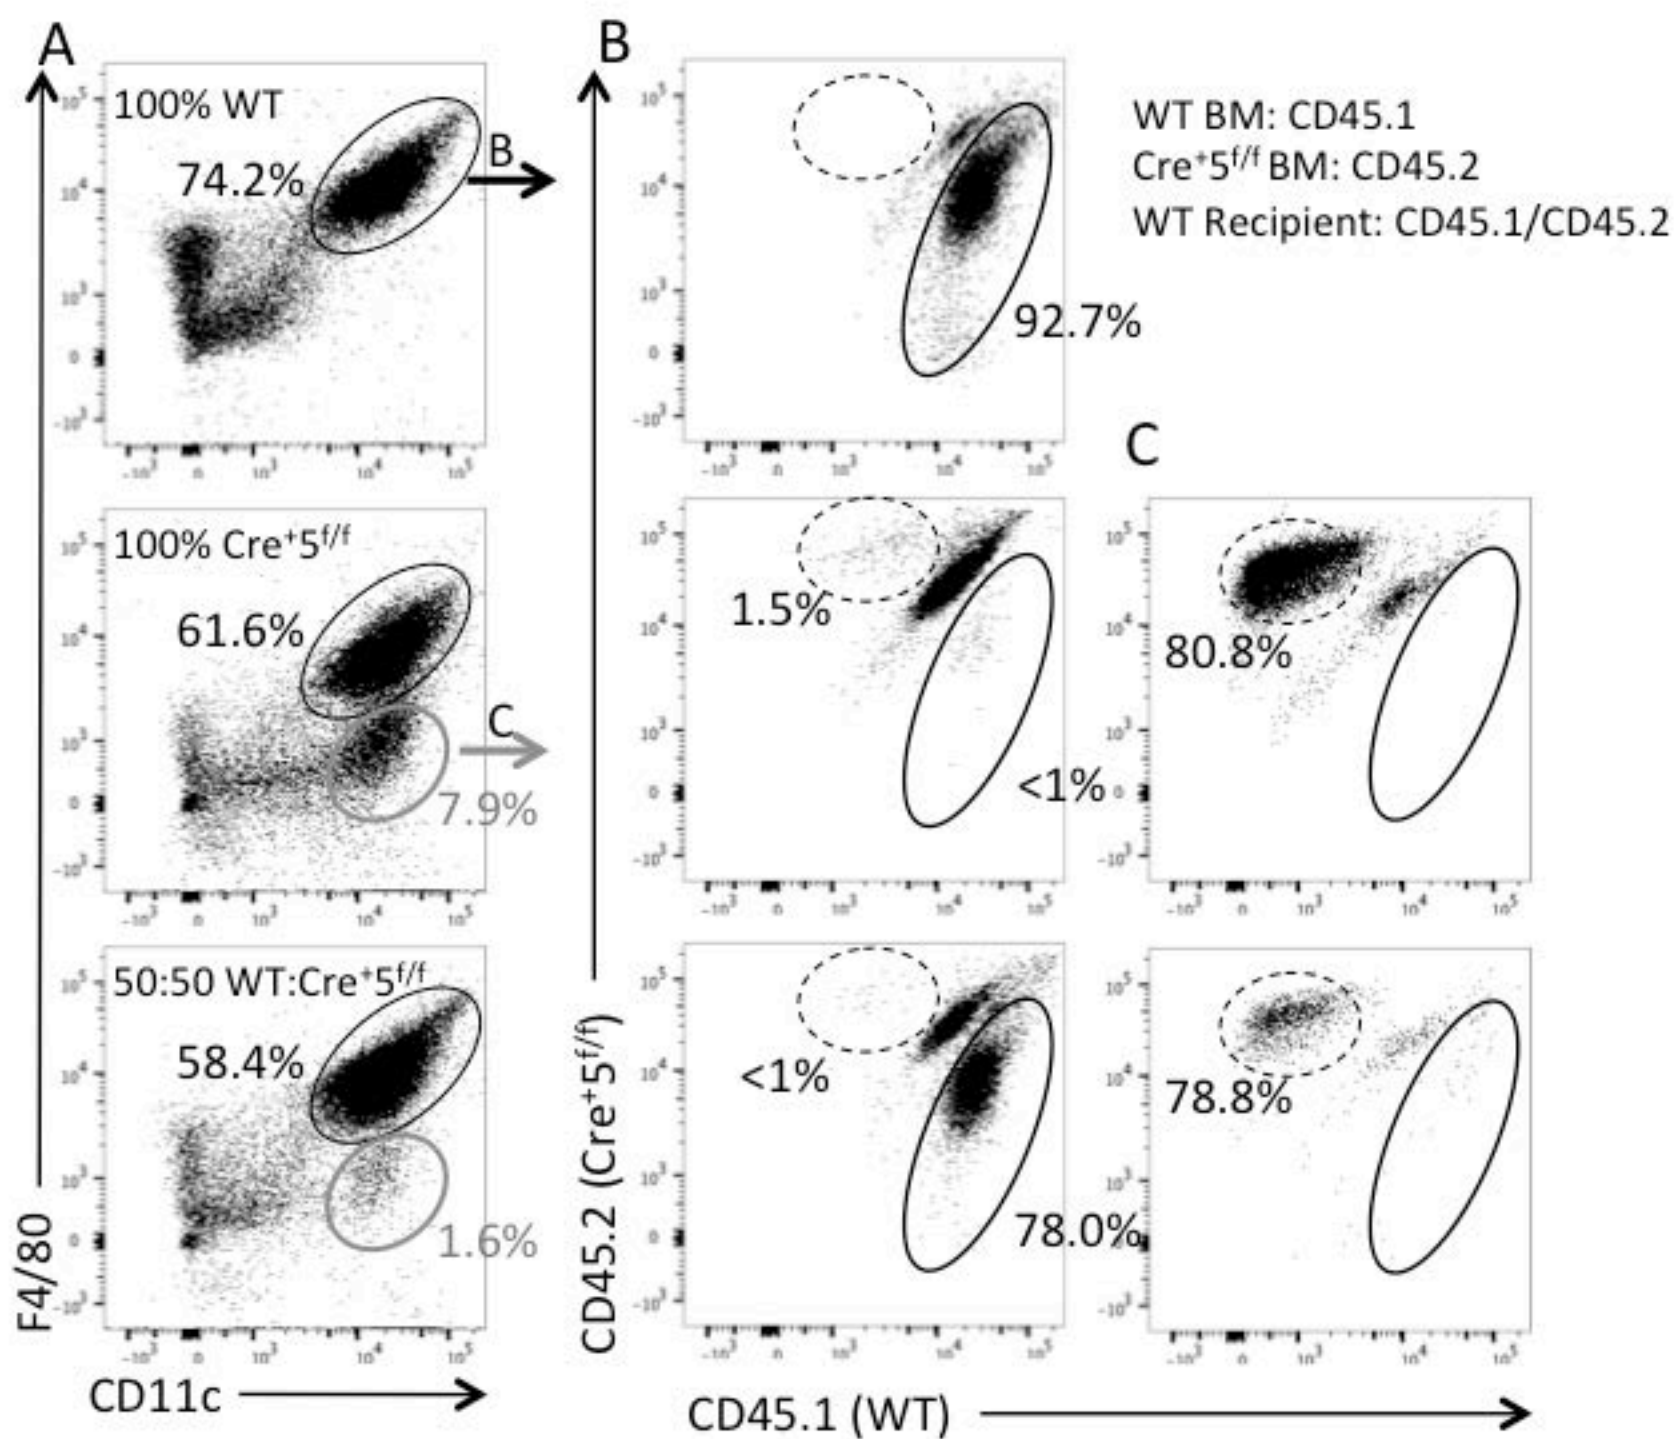

**Supplemental Figure 2. Failure of Stat5-deficient bone marrow to reconstitute alveolar macrophage populations.** Bone marrow chimeras were generated in CD45.1/CD45.2 wild-type recipient mice using CD45.1 wild-type, CD45.1 Cre<sup>5f/f</sup> or 50:50 mixed donor marrow cells. (A, B) At 3 months, the origin of F4/80<sup>+</sup>CD11c<sup>+</sup> alveolar macrophages was determined by CD45.1 and CD45.2 immunostaining. Mice that received WT marrow cells (top row) had a majority of alveolar macrophages of donor origin. Mice that received Cre<sup>5f/f</sup> marrow cells (middle row) had a majority of alveolar macrophages of host origin and fewer than 2% of donor origin. Mice that received a 50:50 mix of WT and Cre<sup>5f/f</sup> marrow cells (bottom row) had a majority of alveolar macrophages of WT donor origin and less than 1% of Cre<sup>5f/f</sup> origin. (C) Mice that received Cre<sup>5f/f</sup> marrow cells had persistence of donor cells that failed to mature into alveolar macrophages.
